# Supplementary material
Source: PubMed Central journal article supplement (PMC5081620)
Supplement: pnas.1609019113.sfig01.pdf [file pnas.1609019113.sfig01.pdf]

| Kinase                    | AX15836<br>1 µM | AX15839<br>1 µM | AX15892<br>1 µM | AX15910<br>1 µM | XMD8-92<br>1 µM |
|---------------------------|-----------------|-----------------|-----------------|-----------------|-----------------|
| Erk5                      | 99.2            | 85.4            | 97.1            | 97.6            | 86.3            |
| AurA                      | 8.7             | 1.9             | 2.1             | -0.7            | 3.0             |
| AurA,AurB,AurC            | -1.5            | 13.0            | -1.6            | -1.5            | -5.4            |
| PIP4K2C                   | 25.2            | 28.5            | 2.4             | -2.9            | 0.3             |
| JAK1 domain1              | 10.8            | -10.6           | 15.9            | 3.6             | -2.8            |
| AMPKa1,AMPKa2             | -3.3            | 1.6             | 11.4            | 15.3            | 8.0             |
| TAO2                      | 0.2             | 6.8             | -7.5            | 0.2             | -2.9            |
| ACK                       | 19.8            | 7.8             | 6.2             | 5.2             | 9.5             |
| ABL,ARG                   | 17.2            | 12.7            | -33.4           | 13.1            | 1.6             |
| PIK3C2B                   | 32.1            | 11.2            | 3.9             | 1.9             | 13.3            |
| CDK2                      | 6.9             | 1.8             | 10.5            | 4.9             | 3.8             |
| PIP5K3                    | 3.8             | 4.3             | -0.8            | -8.6            | 1.4             |
| PKD2                      | 2.7             | 10.0            | -10.6           | 0.4             | 12.0            |
| PIK3C3                    | -2.7            | 1.6             | -6.8            | 16.2            | -10.9           |
| CaMK2g                    | 4.5             | -1.5            | 0.8             | 11.6            | 5.5             |
| p38d,p38g                 | 2.4             | -2.8            | -7.0            | 1.9             | -5.3            |
| RSK1 domain2              | 8.7             | -6.3            | -4.3            | 3.9             | 7.0             |
| CaMK2d                    | 3.8             | -0.8            | 13.4            | 3.8             | 13.2            |
| ATR                       | 28.5            | 19.8            | -2.3            | 2.3             | 8.6             |
| BRAF                      | -3.6            | -5.2            | -5.9            | -0.8            | 3.0             |
| CaMK1d                    | 2.2             | -4.5            | -1.8            | -10.7           | 4.6             |
| CaMK4                     | 3.9             | -9.0            | 3.2             | -0.1            | 4.4             |
| CDC2                      | 1.8             | 3.5             | -0.5            | 6.3             | -0.8            |
| CDK11,CDK8                | 24.1            | 16.8            | -19.7           | 5.8             | 6.4             |
| CDK5                      | 4.4             | -2.4            | 4.7             | -1.8            | 0.1             |
| CDK6                      | 0.4             | 0.9             | -8.2            | -10.9           | 3.2             |
| CDK9                      | 22.6            | 11.2            | -9.2            | 7.0             | -8.3            |
| CHK2                      | 2.6             | 3.3             | -8.2            | -3.0            | 15.0            |
| CK1a                      | 32.2            | 13.3            | 2.6             | -0.9            | 5.0             |
| CSK                       | 2.1             | 3.3             | -1.8            | -14.9           | 11.4            |
| DNAPK                     | 4.4             | 0.8             | -9.7            | 4.0             | -3.6            |
| eEF2K                     | 0.8             | 2.7             | -7.0            | 5.9             | -3.8            |
| Erk1                      | 13.2            | -6.1            | -3.7            | -3.3            | 0.9             |
| FER                       | 7.3             | -4.4            | -7.0            | 8.1             | 9.7             |
| FRAP                      | 2.2             | 1.1             | 5.5             | -7.4            | 10.8            |
| GCK                       | 12.8            | -3.7            | -3.3            | 0.2             | 3.0             |
| GSK3B                     | 9.4             | 4.6             | 3.6             | 0.2             | 0.0             |
| HPK1                      | 12.2            | 6.7             | 4.2             | 14.4            | 11.1            |
| IKKa                      | 2.8             | 0.3             | -3.3            | 4.2             | 4.2             |
| IKKe,TBK1                 | 31.1            | 16.4            | -19.6           | 20.7            | 15.4            |
| ILK                       | 7.4             | -2.9            | -2.2            | 10.9            | 15.5            |
| IRAK4                     | 8.1             | -1.5            | 12.7            | 8.6             | -15.0           |
| IRE1                      | 27.8            | 6.4             | -6.4            | 15.3            | 13.3            |
| JAK1 domain2              | 6.9             | 3.7             | -9.9            | 5.9             | 5.4             |
| JNK1,JNK2,JNK3            | 3.9             | -1.6            | 3.3             | 3.2             | -3.6            |
| KHS1                      | 5.4             | -9.3            | -9.6            | 4.7             | 5.3             |
| LATS1                     | 8.3             | 7.1             | -6.4            | 2.3             | 1.6             |
| LKB1                      | 2.5             | -3.6            | -3.4            | -1.3            | 5.4             |
| LOK                       | 29.3            | 13.6            | 16.5            | 16.9            | -5.8            |
| MAP2K1,MAP2K2             | -5.4            | 9.7             | -4.1            | 0.0             | -3.2            |
| MAP2K3                    | 7.3             | -6.0            | 4.6             | 6.0             | -7.3            |
| MAP2K4                    | 24.5            | 10.8            | 0.3             | -15.0           | 14.9            |
| MAP2K6                    | 26.3            | 6.2             | -3.5            | 5.6             | 17.5            |
| MAP3K2,MAP3K3             | 0.5             | -1.8            | -3.4            | -1.1            | -4.6            |
| MAP3K4                    | 3.0             | 10.2            | 1.5             | 1.6             | -13.6           |
| MARK2,MARK3               | 23.9            | 12.5            | -11.0           | 5.9             | -3.5            |
| MARK3,MARK4               | 11.1            | 3.7             | -0.3            | -2.2            | 15.2            |
| MAST3                     | 6.1             | 5.5             | 8.0             | 2.4             | -10.7           |
| MASTL                     | -0.6            | 4.2             | -2.2            | 1.8             | 2.6             |
| MLK3                      | 27.9            | 4.0             | -30.9           | 6.0             | 4.0             |
| MLKL                      | -4.1            | 7.8             | -14.0           | -6.6            | -4.4            |
| MSK1,MSK2 domain1         | 13.8            | 1.2             | -8.2            | 3.0             | 8.1             |
| MST1                      | 3.2             | -4.4            | -3.1            | 7.5             | 4.1             |
| MST1,MST2                 | 0.1             | -7.1            | 2.4             | -3.1            | 1.1             |
| MST2                      | 4.6             | -2.3            | -5.1            | 0.6             | 3.9             |
| MST3                      | -0.9            | -5.0            | 8.7             | 5.9             | -5.8            |
| MST4,YSK1                 | 1.3             | 0.5             | -7.2            | 3.7             | -3.6            |
| NDR1                      | -1.5            | -4.2            | -5.7            | -2.2            | 1.7             |
| NDR2                      | 16.7            | 8.5             | -24.1           | 15.7            | 12.7            |
| NEK1                      | 4.3             | 15.2            | 17.1            | 5.2             | 3.0             |
| NEK6,NEK7                 | 8.2             | -2.5            | -4.5            | 9.3             | 1.7             |
| NEK7                      | 9.0             | -2.5            | -1.7            | 4.3             | 4.4             |
| NEK9                      | 7.8             | -8.2            | -7.0            | -12.5           | 3.0             |
| p38a                      | 0.0             | -6.3            | 1.2             | 1.4             | 24.9            |
| p70S6K                    | 19.5            | -0.2            | 0.3             | 12.0            | 17.4            |
| p70S6K,p70S6Kb            | 5.3             | 0.8             | -10.1           | 2.5             | 6.6             |
| PCTAIRE2                  | -3.3            | 8.6             | -0.3            | -3.0            | 0.9             |
| PEK                       | 19.6            | 14.8            | -0.9            | 10.2            | 0.8             |
| PHKg2                     | 24.2            | 11.3            | -2.6            | 4.2             | 10.8            |
| PI4KA,PI4KAP2             | 29.2            | 22.2            | 3.6             | 2.4             | 20.2            |
| PI4KB                     | 2.9             | -3.6            | -2.5            | -10.3           | -8.5            |
| PIP4K2A                   | 2.6             | 1.1             | 3.5             | 4.5             | 10.8            |
| PITSLRE                   | 8.2             | -3.3            | 12.5            | 10.9            | -2.1            |
| PKR                       | 4.9             | -0.9            | 2.5             | 6.5             | -1.2            |
| PRPK                      | -0.8            | -8.9            | 9.1             | -7.3            | -4.3            |
| ROCK1                     | 2.0             | -3.8            | 3.9             | 7.7             | -4.3            |
| RSK1,RSK2,RSK3 domain1    | 0.9             | -9.9            | -14.2           | 1.7             | -0.3            |
| RSK2 domain2              | 7.5             | 1.9             | 5.8             | 1.5             | 1.6             |
| RSK2 domain1              | 10.3            | 13.4            | 9.4             | -8.1            | -5.3            |
| SGK3                      | 7.1             | 4.2             | 5.8             | -9.7            | 9.8             |
| SLK                       | 15.2            | -1.7            | 2.8             | -1.0            | -12.8           |
| SMG1                      | -14.2           | 0.5             | 12.0            | 15.4            | 10.0            |
| SRPK1                     | 8.1             | 3.6             | -7.3            | -14.9           | 0.0             |
| SRPK1,SRPK2               | 35.0            | 1.1             | -2.0            | 13.3            | 12.8            |
| TAO1,TAO3                 | -2.2            | 0.2             | -16.1           | 17.7            | -2.3            |
| TLK1                      | 2.3             | -16.5           | 3.4             | -3.6            | -2.6            |
| TLK2                      | 8.1             | 9.7             | 9.4             | -6.7            | 8.3             |
| Wnk1,Wnk2,Wnk3            | 7.8             | -4.4            | -7.7            | -4.3            | -0.1            |
| Wnk1,Wnk2,Wnk4            | 4.9             | -4.8            | 10.7            | -15.6           | 0.7             |
| ZAK                       | 1.1             | -3.5            | -1.7            | 2.0             | 17.7            |
| ZAP70                     | -4.8            | 1.2             | -18.4           | 7.6             | 6.6             |
| ZC1/HGK,ZC2/TNIK,ZC3/MINK | 4.8             | 0.3             | -16.9           | -0.3            | 1.8             |
