# Supplementary material
Source: PubMed Central journal article supplement (PMC5081620)
Supplement: pnas.1609019113.sfig02.pdf [file pnas.1609019113.sfig02.pdf]

| Kinase                  | AX15836    | AX15839    | AX15892    | AX15910    | XMD8-92    |
|-------------------------|------------|------------|------------|------------|------------|
|                         | 10 $\mu$ M |
| Erk5                    | 96.1       | 94.5       | 95.8       | 97.4       | 96.7       |
| PIK3CD                  | -9.3       | 29.3       | 53.8       | 86.6       | 66.9       |
| FAK                     | 31.2       | -40.1      | 40.2       | 46         | 52.5       |
| RSK1 domain2            | 32.8       | 18.3       | 38.3       | 51.7       | 55.6       |
| RSK2 domain2            | 15.6       | 15.6       | 47.9       | 51.8       | 26.7       |
| PKD3                    | -11.7      | 51.4       | 35.6       | 42.5       | -5.5       |
| MPSK1                   | 2.5        | -8.9       | 4.2        | 48.8       | 31.3       |
| NLK                     | 41.7       | 80.8       | 27.6       | 71.9       | 24.3       |
| AurB                    | -1.3       | 57         | 1.7        | -11.7      | 21.3       |
| AurA                    | 17.7       | 39.1       | 9.2        | 4.5        | 18.8       |
| TAO2                    | 7.5        | 57.8       | -4.1       | 22.4       | 3.2        |
| ACK                     | 6.1        | -7.5       | 6.3        | 30.9       | 59.8       |
| PIK3C2B                 | -4         | 18.4       | 13.2       | 20.6       | 35.6       |
| CDK7                    | 40.1       | 20.3       | -3.5       | 23.9       | 2.3        |
| ABL, ARG                | -2.2       | -19.3      | 15.5       | 26.6       | 1.3        |
| AGK                     | 4.4        | -18.9      | -36.5      | -15.2      | -22.3      |
| AKT1                    | 7.5        | -20        | -5.3       | -15.3      | 15.1       |
| AKT2, AKT3              | -6.6       | -9.2       | -2.4       | -4.3       | 7.2        |
| AMPKa1                  | -9.7       | -11        | -12.5      | -3.7       | 7          |
| AMPKa1, AMPKa2          | -1         | -7.4       | 4.4        | 16.9       | 3.5        |
| ARAF                    | -7.6       | 4.6        | 5.6        | -6.3       | -4.6       |
| ATR                     | -7.4       | -30.8      | -8.9       | 8.3        | -3.8       |
| BARK1                   | -11        | 12.3       | 5.2        | 4.8        | -3.8       |
| BRAF                    | -5.4       | 8.7        | 3.9        | -12.1      | -4.2       |
| CaMK1d                  | -3.7       | -1.5       | 15.5       | -11.3      | -18        |
| CaMK2d                  | 0.9        | 3.8        | 8.9        | 19         | 17.6       |
| CaMK2g                  | 1.7        | -5.7       | 1.4        | 6.6        | 10.2       |
| CaMK4                   | -9.9       | 5.5        | 3.4        | 1          | -3.1       |
| CaMKK2                  | -0.1       | 5.4        | 9.2        | 12.6       | 21.2       |
| CCRK                    | -4.4       | -3.5       | -5.5       | -11.1      | -4.1       |
| CDC2                    | -8.1       | 3.4        | 3.4        | -3.6       | -1.8       |
| CDK10                   | 4.5        | -4.8       | -6.6       | 12         | 8.1        |
| CDK11, CDK8             | 9.8        | 15         | -2.1       | 33.5       | 15.1       |
| CDK2                    | -2.8       | -4.2       | 0.2        | -6.2       | 0.2        |
| CDK5                    | 2.5        | 1          | -22.2      | -7.5       | 0          |
| CDK6                    | -2         | -10.7      | -0.6       | -2.2       | 0.3        |
| CDK9                    | 12.5       | -22.4      | -7.3       | 13.5       | 8.1        |
| CHED                    | 6.1        | 8.2        | -0.5       | -8.7       | 2.5        |
| CHK1                    | 1.1        | 4.4        | 7.2        | -1.6       | -2.2       |
| CHK2                    | -2.9       | 5          | -5.1       | -14.8      | 3.2        |
| CK1a                    | -0.6       | -26.9      | -2.9       | 19         | 8.4        |
| CK1d, CK1e              | -21.5      | -29.4      | -9.8       | 14.6       | -6         |
| CK1g1                   | -2.4       | 9.3        | -21.1      | -26.7      | -4.3       |
| CK1g2                   | -4.4       | -8.3       | -3.7       | -6.5       | -3.7       |
| CK2a1                   | -5.8       | -0.5       | 5.2        | -18.4      | -2.9       |
| CLK1                    | 4.7        | -0.3       | 1.3        | -7.5       | -1.2       |
| CLK3                    | -4.4       | -7.3       | 1.7        | -23        | -2.9       |
| CRK7                    | 12.7       | -2.4       | -15.2      | -17.9      | -1.9       |
| CSK                     | -8.1       | 2.6        | 2.5        | -3.8       | -2.2       |
| DGKA                    | -3.4       | -2.7       | 3.7        | -0.7       | 8.7        |
| DGKH                    | -7.8       | -2.9       | -23        | 5.4        | -4         |
| DGKQ                    | 7.3        | -3.6       | -33        | 5.7        | -11.8      |
| DNAPK                   | 2.5        | 4.1        | -1.4       | -4.9       | 4.5        |
| DRAK1                   | -2.5       | 19.9       | -2.3       | -11.5      | -1.3       |
| eEF2K                   | 4          | -12.7      | -20.1      | -10.4      | -7.9       |
| Erk1                    | -3.2       | -5.1       | -4.8       | -5.1       | -4.2       |
| Erk2                    | -0.7       | -4.6       | 0.8        | -6.2       | -6         |
| FER                     | -2.8       | 8.6        | 12.8       | 1          | 10.9       |
| FGR                     | 16.5       | 2          | 14.3       | 9.7        | -10.9      |
| FRAP                    | -12.7      | 1          | 5.3        | -0.9       | -8         |
| FYN                     | -22.2      | -18.6      | -8.6       | -3.9       | 8          |
| FYN, SRC, YES           | -14.5      | -5.1       | -1.5       | -10.9      | -9.3       |
| GCK                     | 13.8       | -13.8      | -9.5       | 2.5        | -1.8       |
| GCN2                    | 0.6        | 0.3        | -0.9       | -6         | -3.7       |
| GPRK5                   | -22.2      | -5.7       | -4.2       | -16.1      | -14.8      |
| GPRK6                   | -6.2       | 5.5        | 11.4       | 8.4        | -19.5      |
| GSK3A                   | 0.7        | -13        | -6.2       | -9.6       | 0.3        |
| GSK3B                   | -6.3       | -0.4       | -0.6       | -8.6       | -2.3       |
| HPK1                    | 10.9       | -9.4       | -21        | -11.2      | -9.7       |
| IKKa                    | 3.2        | -1         | -5.4       | -8         | -3.9       |
| IKKb                    | -1.4       | 3.5        | 0.4        | -7.1       | 2.5        |
| IKKe                    | -9.4       | -4.5       | 0.7        | -7.2       | 1.7        |
| IKKe, TBK1              | -5.2       | -28.6      | -3.6       | 14.2       | 5.5        |
| ILK                     | -13        | -8.9       | -6.6       | -12.7      | 2.2        |
| IRAK1                   | -5.6       | 0.1        | 3.7        | 0.6        | 5.1        |
| IRAK4                   | 4.7        | -5.1       | -5.1       | -4.9       | 4.5        |
| IRE1                    | -1.5       | -15.2      | 3.8        | 17.3       | 11.3       |
| ITK                     | -14.9      | -1.4       | -9.8       | -11.8      | -4.3       |
| ITPK1                   | -4.7       | -9.8       | 17.5       | 4.6        | -7.9       |
| JAK1 domain1            | -14.2      | -3.5       | -10.8      | -17.3      | -13.8      |
| JAK1 domain2            | -9.5       | 6.6        | 1.1        | -7.1       | -8.3       |
| JNK1, JNK2, JNK3        | -3.4       | 6.9        | -4.7       | -0.4       | 0.8        |
| JNK2                    | -19.8      | 5.1        | 10.3       | -39.6      | 3.1        |
| KHS1                    | -1.2       | -1.4       | -9.6       | -7         | -9.2       |
| KHS2                    | 1.2        | 8.8        | -4.8       | -0.7       | 9.5        |
| KSR1, KSR2              | 3.4        | 3.4        | -3.4       | -19.6      | -7.5       |
| LATS1                   | 2.1        | 3.8        | -7.5       | -0.8       | -5.5       |
| LATS2                   | -11.5      | 0.5        | 0.3        | -13.4      | -16.9      |
| LCK                     | 0.2        | 9.6        | 15.5       | -3.7       | 5.3        |
| LKB1                    | -10.2      | -8.4       | -5.2       | -8.3       | 1.5        |
| LOK                     | -5.6       | 6          | -1.8       | -1.7       | -2.5       |
| MAP2K1                  | -0.9       | -18.4      | 11.5       | 16.2       | 10.7       |
| MAP2K1, MAP2K2          | -5         | 4.7        | 2.8        | -4.4       | -4.8       |
| MAP2K3                  | 6.1        | -2.6       | -6.3       | -5.8       | -3.6       |
| MAP2K4                  | 4          | 2.8        | -17.5      | -7.7       | -2.9       |
| MAP2K5                  | 0          | -22.1      | 3.7        | 19.7       | 13.2       |
| MAP2K6                  | -4.7       | -4.2       | 13.6       | 14.1       | 8.3        |
| MAP2K7                  | -3         | 1.9        | -7.2       | -13.8      | -6.2       |
| MAP3K1                  | 14.7       | -8         | -15.5      | 6.5        | -1.5       |
| MAP3K15, MAP3K5, MAP3K6 | 3.2        | 4.6        | 1.4        | -6.5       | -3         |
| MAP3K2                  | -9.9       | 14.7       | 10.9       | -6.3       | 0.4        |
| MAP3K2, MAP3K3          | 5.2        | 5.9        | 0.9        | 0.7        | 1          |
| MAP3K3                  | -5.9       | -17.1      | -7.6       | -14.6      | -17        |

|                             |       |       |       |       |       |
|-----------------------------|-------|-------|-------|-------|-------|
| MAP3K4                      | 11.6  | -11.6 | -9.3  | -2.8  | -7.4  |
| MAP3K5                      | 18.1  | -13.7 | -10.2 | -6.2  | -6.9  |
| MAPKAPK3                    | -9.6  | -5.5  | -3    | -6.1  | -1.7  |
| MARK1, MARK2                | -3.6  | 4.6   | -2.8  | -11.7 | -8.7  |
| MARK2                       | -5.6  | -2.4  | -5.3  | -8.7  | -10.1 |
| MARK3                       | -3.8  | 8.4   | -5.3  | -9.5  | -16.1 |
| MARK4                       | 5.3   | 1.2   | -3.8  | -1    | 2.5   |
| MAST3                       | -2.4  | 1.6   | 2.8   | -8.8  | -2.1  |
| MASTL                       | -8.8  | -3.4  | -6.2  | -10.3 | -10.5 |
| MLK1                        | 1.1   | -3.4  | 0.8   | -7    | -3.2  |
| MLK2                        | 13.2  | -14   | 0.2   | -13   | 19.4  |
| MLK3                        | -13.7 | -4.2  | -6.1  | 7.5   | 2.7   |
| MLK4                        | 3.6   | -8.8  | -2.3  | -4.5  | -3.2  |
| MLKL                        | -14.6 | -29.8 | -16.8 | -27.6 | -6    |
| MSK1 domain1                | 15.5  | 4.5   | 8.8   | -23.8 | -10.5 |
| MSK2 domain1                | -12.7 | -12.5 | 2.9   | -18.9 | -21.7 |
| MST1                        | -9.4  | 3     | 0.7   | -3.7  | -10.8 |
| MST2                        | -4    | -0.6  | 5.8   | -7.1  | -5.6  |
| MST3                        | -8.1  | 1.2   | -4.7  | -2.8  | -5.4  |
| MST4                        | 3.5   | -9.1  | -22.5 | -32.4 | -38.5 |
| MST4, YSK1                  | 13    | -9.3  | -27.1 | -6    | -4.3  |
| NDR1                        | -6.4  | 1.5   | -7.4  | -4.4  | -4.8  |
| NDR2                        | -7.1  | 0.9   | -3.5  | -10   | -0.7  |
| NEK1                        | -0.6  | 0.4   | -15.8 | -10   | -3.4  |
| NEK3                        | 9.9   | 4.8   | 1.9   | -3.8  | 10.1  |
| NEK6, NEK7                  | -7.6  | 0.8   | 0.2   | -15   | 1     |
| NEK7                        | -11.7 | -7.7  | -6.7  | -12.7 | -2.8  |
| NEK8                        | -8.2  | -0.1  | -10.1 | -12.3 | -7.1  |
| NEK9                        | -12.8 | -10.8 | 4.2   | -2.6  | -5.4  |
| OSR1                        | 0.2   | -4.4  | 2.2   | -5.5  | -0.4  |
| p38a                        | 6.9   | -7    | 1.3   | 4.6   | 3.6   |
| p38a (MAPKAP2,MAPKAP3)      | -0.3  | -6.1  | 9     | -3.5  | -1.6  |
| p38b (MAPKAP2,MAPKAP3)      | 26.9  | -7.4  | 5.5   | 31    | 2.3   |
| p38d, p38g                  | -5.1  | 15.4  | -17   | -5.3  | 11.4  |
| p70S6K                      | 8.1   | -9.2  | 11.9  | 20.9  | 6.5   |
| p70S6Kb                     | -2.3  | -12.3 | 10.3  | 17.6  | 9.6   |
| PAK2                        | 18.4  | -14.5 | 9.4   | -19.2 | -6.7  |
| PAN3                        | 4.9   | -11.8 | 6.4   | 15.2  | 8.9   |
| PCTAIRE1                    | -13.2 | 7.5   | 30.6  | 4.8   | -2.8  |
| PCTAIRE1, PCTAIRE3          | 4.2   | -1.9  | 21.7  | -1.1  | -1.9  |
| PCTAIRE2                    | -6.5  | -5.3  | 21.1  | -3    | -3.9  |
| PCTAIRE2, PCTAIRE3          | -4.9  | 1.4   | 18.6  | -9.4  | -3.3  |
| PDK1                        | -11   | -7.9  | 8     | 4     | -6.9  |
| PEK                         | 3.8   | -21.4 | -6.1  | 12.6  | 9.5   |
| PHK2                        | -7    | -11.9 | -6.4  | 8.8   | 4.8   |
| PH4A, PH4KAP2               | 8.9   | 16.6  | 15    | 25.5  | 25.1  |
| PI4KB                       | 0     | -6.3  | -14.4 | -4.6  | 2.8   |
| PI4KB                       | 5.8   | 5.7   | -4.5  | -29.5 | 0     |
| PIK3C3                      | -12.5 | -7    | 1.6   | 14.1  | -1.7  |
| PIK3CB                      | -9.1  | -38.9 | -25.8 | 32.4  | 14.7  |
| PIK3CG                      | -4.8  | 2.4   | 10.7  | -8    | -0.8  |
| PIP4K2A                     | -11.8 | 1.4   | -4    | -10   | -6.6  |
| PIP4K2B                     | -12   | -1.3  | 11.1  | 5.1   | 0.9   |
| PIP4K2C                     | -11.9 | 5.8   | 15.4  | 13.4  | 5.9   |
| PIPSK3                      | -9.2  | 10.6  | 5.9   | 13.2  | -4.9  |
| PITSLRE                     | -4.6  | 0.2   | -6.1  | -2.5  | -5.3  |
| PKCa                        | -24.4 | -0.8  | -2.2  | -18.4 | -4.6  |
| PKCa, PKCb                  | 1.9   | -7.8  | 3.8   | 15.3  | 7     |
| PKCh                        | -11.6 | 15.4  | -6.1  | -1.6  | 8.5   |
| PKCi                        | -5.3  | -0.3  | -3.7  | -6.2  | -11.2 |
| PKD1, PKD2                  | 9.8   | 19    | 7.1   | 33.6  | -5.1  |
| PKD2                        | 1.3   | 15.7  | 10.6  | 22.4  | 5.5   |
| PKN1                        | -6.6  | 8.8   | -9.9  | -17.3 | -15.4 |
| PKN2                        | -2.9  | 5.8   | 1.3   | -22.1 | -12   |
| PKR                         | 1.9   | -5    | -7    | -4.2  | 3.3   |
| PLK1                        | -2.9  | 2.6   | 7.4   | -6.6  | -4    |
| PRP4                        | -5.1  | 8     | 0.8   | -12.9 | -6.6  |
| PRPK                        | -3.3  | -20   | -32.2 | -14.9 | -8.7  |
| PYK2                        | 16.2  | -13.6 | 1.3   | -3.1  | -3.1  |
| QSK                         | -6.1  | 19    | 7.2   | -4    | -7    |
| RAF1                        | 8.1   | -5.6  | 6.9   | 29.1  | 5.8   |
| RIPK3                       | 2.6   | 7.6   | 5.2   | -8.9  | -6.1  |
| ROCK1, ROCK2                | 5.9   | -21.1 | 10.8  | 20.9  | 11.8  |
| RSK1 domain1                | -24.1 | -7.2  | -8.1  | -1.8  | -1.7  |
| RSK2 domain1                | -3.9  | 8.7   | 15.8  | -1.5  | -2    |
| RSKL1                       | 4     | 0.7   | 0.9   | 3.4   | 6.4   |
| SGK3                        | -2.2  | -1.4  | -1.9  | -7    | -1.4  |
| SLK                         | -11.3 | 7.7   | 1.4   | -4    | -4.2  |
| SMG1                        | -6.2  | 1.5   | 4.6   | -5.5  | -8.2  |
| SNRK                        | -4.1  | -9.8  | -8    | -9.1  | 1.6   |
| SRPK1                       | -3    | -8.5  | -2.8  | -10.3 | -3.6  |
| SRPK1, SRPK2                | -11.4 | 0     | -12.5 | 4.9   | 18.6  |
| STLK3                       | -2    | 3.1   | -16.9 | -22.3 | -3.1  |
| STLK5                       | 0.1   | 6.8   | 11.1  | -18   | -7.5  |
| STLK6                       | 2.3   | 9.6   | -11.7 | 0.3   | -6.1  |
| TAK1                        | -13.1 | 7.2   | 3.4   | -12.6 | 2.6   |
| TAO1, TAO3                  | 13.5  | -0.6  | -14.3 | 5.3   | 0.9   |
| TBK1                        | 21.1  | 4.5   | -8.7  | 5.8   | 12.7  |
| TLK1                        | -12.4 | 1.5   | 2.5   | -8.5  | -6.5  |
| TLK2                        | -0.2  | -1.5  | 7.5   | -0.7  | 6     |
| TYK2 domain2                | -0.2  | -10.5 | -8.2  | 0     | -1.8  |
| ULK1                        | 2     | -1.6  | -6.8  | -7.4  | -1.4  |
| ULK3                        | -6.7  | -1.8  | -2.8  | -9.4  | -5.6  |
| Wnk1, Wnk2                  | -3.2  | -5.4  | -16.5 | -16.2 | -6.9  |
| Wnk1, Wnk2, Wnk3            | 1.2   | -6.3  | -10.7 | -9.8  | 1.2   |
| Wnk1, Wnk2, Wnk4            | 4.5   | 1.2   | -7    | -10.3 | 0.5   |
| ZAK                         | -4.8  | -3.1  | 2.1   | -1    | 0.9   |
| ZAP70                       | -0.1  | 16.9  | 10.8  | 6.5   | 3.5   |
| ZC1/HGK                     | -5.6  | -20.7 | -13   | 6.8   | 1.3   |
| ZC1/HGK, ZC2/TNIK, ZC3/MINK | 1.7   | -8    | -1.8  | -1    | -1.3  |
| ZC2/TNIK                    | -16.9 | -41   | -19.1 | -6.7  | 3.8   |
