# Supplementary material
Source: PubMed Central journal article supplement (PMC5081620)
Supplement: pnas.1609019113.sfig03.pdf [file pnas.1609019113.sfig03.pdf]

| Kinase                                   | JQ1        | I-BET762   |
|------------------------------------------|------------|------------|
|                                          | 10 $\mu$ M | 10 $\mu$ M |
| ABL, ARG                                 | 8.0        | -4.4       |
| ACK                                      | -20.1      | 10.8       |
| AMPKa1, AMPKa2                           | -9.3       | 1.9        |
| ATR                                      | 2.4        | 0.3        |
| AurA                                     | 5.5        | 9.2        |
| AurA, AurB, AurC                         | 1.3        | 5.5        |
| BRAF                                     | -5.3       | 6.7        |
| CaMK1d                                   | -24.4      | -24.5      |
| CaMK2d                                   | -12.0      | -10.8      |
| CaMK2g                                   | -7.3       | 0.5        |
| CaMK4                                    | -16.1      | -6.1       |
| CDC2                                     | -0.2       | -15.0      |
| CDK11, CDK8                              | 13.6       | 14.6       |
| CDK2                                     | 0.3        | 1.0        |
| CDK5                                     | 0.6        | 3.1        |
| CDK6                                     | 5.8        | 4.1        |
| CDK9                                     | 10.0       | 2.9        |
| CHK1                                     | -0.8       | -4.2       |
| CHK2                                     | -0.6       | 1.0        |
| CK1a                                     | 7.4        | 6.9        |
| CSK                                      | -2.1       | 6.1        |
| DNAPK                                    | -2.2       | -1.6       |
| eEF2K                                    | -10.4      | -16.1      |
| Erk1                                     | -3.0       | -2.9       |
| Erk5                                     | 17.5       | 11.4       |
| FER                                      | 8.0        | 13.3       |
| FRAP                                     | 0.9        | -1.1       |
| GCK                                      | 3.9        | 14.3       |
| GSK3B                                    | 3.7        | -5.1       |
| HPK1                                     | -12.8      | 7.4        |
| IKKa                                     | -8.3       | 0.2        |
| IKKe, TBK1                               | 8.2        | 5.2        |
| ILK                                      | 1.6        | 1.2        |
| IRAK4                                    | -2.3       | 8.3        |
| IRE1                                     | -6.6       | 20.6       |
| JAK1 domain1                             | 5.4        | 10.3       |
| JAK1 domain2                             | -4.7       | -4.0       |
| JNK1, JNK2, JNK3                         | -8.1       | 3.9        |
| KHS1                                     | -0.7       | -2.0       |
| LATS1                                    | 0.2        | 4.7        |
| LKB1                                     | -5.6       | 2.0        |
| LOK                                      | 5.3        | 4.7        |
| MAP2K1, MAP2K2                           | 0.0        | -1.3       |
| MAP2K3                                   | 0.0        | 5.3        |
| MAP2K4                                   | 1.4        | 5.5        |
| MAP2K6                                   | -10.4      | 16.3       |
| MAP3K2, MAP3K3                           | 2.3        | -0.1       |
| MAP3K4                                   | 9.0        | 0.6        |
| MARK2, MARK3                             | 0.0        | -11.9      |
| MARK3, MARK4                             | 4.7        | 0.2        |
| MAST3                                    | -1.8       | 0.3        |
| MASTL                                    | -7.7       | -1.8       |
| MLK3                                     | 14.6       | 8.9        |
| MLKL                                     | -1.6       | -6.2       |
| MSK1 domain1, MSK2 domain1               | -1.9       | 8.5        |
| MST1                                     | 2.8        | 2.9        |
| MST2                                     | 17.6       | 15.1       |
| MST3                                     | -5.9       | -20.8      |
| MST4, YSK1                               | 0.1        | -4.4       |
| NDR1                                     | -0.3       | 2.3        |
| NDR2                                     | -11.9      | -6.4       |
| NEK1                                     | 0.6        | -7.7       |
| NEK6, NEK7                               | -6.5       | 2.3        |
| NEK7                                     | -1.0       | 3.2        |
| NEK9                                     | 12.3       | 2.4        |
| p38a                                     | -25.4      | -18.6      |
| p38d, p38g                               | 2.2        | 0.4        |
| p70S6K                                   | 1.2        | -9.5       |
| p70S6K, p70S6Kb                          | -3.0       | 0.1        |
| PCTAIRE2                                 | 9.7        | -11.7      |
| PEK                                      | -1.3       | -1.3       |
| PHKg2                                    | -12.9      | 3.2        |
| PI4KA, PI4KAP2                           | 9.7        | 6.3        |
| PI4KB                                    | 2.9        | 4.2        |
| PIK3C2B                                  | 3.6        | 16.2       |
| PIK3C3                                   | 6.5        | -1.7       |
| PIK3CD                                   | -17.1      | -8.9       |
| PIP4K2A                                  | -6.5       | -6.4       |
| PIP4K2C                                  | -5.0       | 1.7        |
| PIP5K3                                   | -9.0       | 0.4        |
| PITSLRE                                  | -3.5       | 0.0        |
| PKCi                                     | 10.3       | 4.7        |
| PKD2                                     | 0.3        | -2.6       |
| PKR                                      | -10.8      | 2.2        |
| PRPK                                     | -3.2       | 11.1       |
| ROCK1                                    | -7.2       | -9.1       |
| RSK1 domain1, RSK2 domain1, RSK3 domain1 | -1.5       | 7.5        |
| RSK1 domain2                             | 5.9        | 1.0        |
| RSK2 domain1                             | -23.0      | -1.4       |
| RSK2 domain2                             | -28.6      | -2.4       |
| SGK3                                     | 0.7        | 5.0        |
| SLK                                      | -1.9       | 8.8        |
| SMG1                                     | -7.6       | -7.1       |
| SRPK1                                    | -1.2       | 5.1        |
| SRPK1, SRPK2                             | 4.6        | 14.3       |
| TAO1, TAO3                               | -13.5      | -25.3      |
| TAO2                                     | -8.3       | -0.3       |
| TLK1                                     | 1.6        | -12.8      |
| TLK2                                     | -3.5       | -12.5      |
| Wnk1, Wnk2, Wnk3                         | 13.5       | 5.8        |
| Wnk1, Wnk2, Wnk4                         | 2.8        | 2.9        |
| ZAK                                      | -5.0       | 3.1        |
| ZAP70                                    | 1.7        | -1.0       |
| ZC1/HGK, ZC2/TNIK, ZC3/MINK              | 1.4        | -2.3       |
